# Supplementary material
Source: publisher site journal article supplement (https://www.degruyterbrill.com/publication/isbn/9783110673463/downloadAsset/9783110673463_Begleitmaterial_8.%20Auflage.7z)
Supplement: Supplementary file 1 [file V8_Kap_11_Begleitmaterial.pdf › mark_splm_9783110673456_Begleitmaterial_8. Auflage/V8_Kap_11_Begleitmaterial.pdf]

## **Inhaltsverzeichnis**

|           |                                            |          |
|-----------|--------------------------------------------|----------|
| <b>15</b> | <b>Begleitmaterial zu Kapitel 11 .....</b> | <b>2</b> |
| 15.1      | Zeitinvariante und lineare Systeme.....    | 2        |
| 15.2      | Rechteck- und Trapezintegration.....       | 4        |

# 15 Begleitmaterial zu Kapitel 11

In diesem Kapitel sind die MATLAB-Codes der numerischen Integrationsmodelle dargestellt, auf die in der 8. Auflage „VHDL-Simulation und -Synthese“ mit dem Literaturhinweis [111] verwiesen wird. Für alle Varianten der kombinierten Rechteck- und Trapezintegration werden die quantitativen Auswertungen gegenübergestellt.

## 15.1 Zeitinvariante und lineare Systeme

Der MATLAB-Code 15-1 bestimmt die Koeffizienten des diskretisierten Systems nach Gl. 11-22 und berechnet die zugehörigen Zeitverläufe  $y_1[n]$  und  $y_2[n]$  in Bild 11-2. Zur Abschätzung der erforderlichen Anzahl  $P$  der Potenzreihenglieder in Gl. 11-14 wird in [96] eine Norm angegeben, die sich aus dem Zuwachsterm in  $\underline{s}(T)$  ergibt:

$$\text{Gl. 15-1} \quad \left\| \underline{A}^P \frac{T^P}{(P+1)!} \right\|$$

Für  $P=1$  bis  $P=4$  werden dazu die Frobenius-Norm  $N$  berechnet, d.h. die Wurzel aus der Summe der Betragsquadrate aller Matrixelemente  $a_{ij}$ . Mit dem genutzten Wert  $P=2$  zeigt der MATLAB-Worksspace einen Wert von  $N^2=781$ , der schon um den Faktor 12 kleiner ist als  $N^1=9375$ .

Die Wertquantisierung der Koeffizienten nach Tabelle 11-1 erfolgt mit der Struktur:

```
q = quantizer('Mode','Roundmode','Overflowmode',[Wordlength Fractionlength])
```

Darin sind die folgenden Modi für das Q-Format gewählt worden:

- Mode: 'fixed' für eine Darstellung im 2er-Komplement
- Roundmode: 'fix' für Runden gegen Null
- Overflowmode: 'saturate' für Sättigung bei Bereichsüberschreitung
- Wordlength: Vektorbreite incl. Vorzeichen, Guardbits und Nachkommastellen
- Fractionlength: Anzahl der Nachkommastellen

Die quantisierten Koeffizienten des VHDL-Codes 11-1 (vgl. Tabelle 11-2) ergeben sich als binärere Werte mit der Funktion: `Q_Format_Wert = num2bin(q, Gleitkomma_Wert)`

```
%VHDL-Synthese 8. A. Kapitel 11.1

%Diskretisierung des linearen Systems 2. Ordnung (Gl. 10-17): Gl. 11-22
%1. gam u. phi Auswertung nach G. 11-20/11-21
%2. Diskretisierung mit sysd(,, ZOH) (zero order hold: Treppenstufen)
d = 0.2;           % Dämpfung nach Tabelle 10-6
d2=2*d;
ta = 1/48000;      % Abtastperiode T=20.83 µs
w0=2*pi*4774.65;   % Kreisfrequenz Omega_Null=2pif0=30000 1/s
w_2 = w0*w0;
num = [0 0 w_2];   % Zählerpolynom
den = [1 d2*w0 w_2]; % Nennerpolynom
[A1, B1, C1, D1] = tf2ss(num,den); % Übertragungsfkt.-> Zustandsraum (y2;y1)
% Kontinuierliche Zustandsraumdarstellung
A = [0, 1; -w_2, -d2*w0]; % Gl. 11-18 mit Ausgang y = y1
B = [0; w_2];
C = [1, 0];
sys = ss(A,B,C,0); % Struktur des kontinuierlichen Systems
sysd = c2d(sys, ta, 'ZOH'); % Struktur des diskreten Systems Ad, Bd
test_gam2=sysd.b(2,1); % Strukt.-Zugriff auf gamma2 des Vektors Bd
% Koeffizienten des mit der Fundamentalmatrix diskretisierten Systems
gam2 = ta*w_2*(1 - ta*d2*w0/2 + ta^2*w_2*(d2*d2 -1)/6); % Gl. 11-20
gam1 = ta*w_2*(ta/2 - ta*ta*d2*w0/6);
phi11= 1+ta*(-ta*w_2/2 + ta*ta*d2*w0*w_2/6); % Gl. 11-21
phi12= ta*(1- ta*w0*d2/2 + ta*ta*w_2*(d2*d2-1)/6);
phi21= ta*w_2*(-1+ ta*ta*w_2*(1 - d2*d2)/6 + ta*w0*d2/2);
phi22= 1 + ta*(ta*w_2*(d2*d2- 1)/2 + ta*ta*w_2*w0*d2*(2- d2*d2)/6 -d2*w0);
PHI= [phi11, phi12;phi21, phi22]; % Systemmatrix Ad
GAM = [gam1;gam2]; % Eingangsverstärkungsvektor Bd
% Norm als Abbruchfehler für die Potenzreihenentwicklung von S(T) Gl. 11-14
N1 = ta*norm(A,'fro')/2; % P=1 Potenzreihenglieder A^P
N2 = ta*ta*norm(A*A,'fro')/6; % P=2
N3 = ta*ta*ta*norm(A*A*A,'fro')/24; % P=3
N4 = ta^4*norm(A^4,'fro')/120; % P=4
% Q-Format
% Quantisierungsfunktionen für die Parameter des diskreten Systems Ad, Bd
q12 = quantizer('fixed','fix', 'saturate',[12 11]); % [s.10:0]
q12b = quantizer('fixed','fix', 'saturate',[12 7]); % [s.4g.6:0]
q15 = quantizer('fixed','fix', 'saturate',[15 0]); % [s.14g]
q18 = quantizer('fixed','fix', 'saturate',[18 17]); % [s.16:0]
% Q-Format Koeffizienten des diskretisierten Systems Ad, Bd Tabelle 11-2
gal = num2bin(q12b, gam1*64); % am Summenpunkt für Y1_I
ga2 = num2bin(q15, gam2); % gam2=-phi21
ph11 = num2bin(q12, phi11);
ph12 = num2bin(q18, phi12*64); % am Summenpunkt für Y1_I
ph21 = num2bin(q15, phi21);
ph22 = num2bin(q12, phi22);
%
% Zeitverläufe y1[n] u. y2[n] nach Gl. 11.22 mit Gleitkommakoeffizienten
U =1; % Amplitude der sprungförmigen Eingangsgröße
AZ= 0.001/ta; % Anzahl der diskreten Zeitverlaufswerte n in [1,AZ]
y1 = zeros(AZ,1); % Initialisierung der Zeilenvektoren mit AZ Elementen
y2 = zeros(AZ,1); % Zustandsgrößen des Systems nach Gl. 11-21/11-22
y1c=y1; % Zustandsgrößen des mit sysd=c2d() diskretisierten Systems
y2c=y2;
```

```

%
for n = 1:1:AZ-1      % Indizes der Vektoren und Matrizen starten bei 1
    y1(n+1) = phi11*y1(n) + phi12*y2(n) + gam1*U;
    y2(n+1) = phi21*y1(n) + phi22*y2(n) + gam2*U;
    y1c(n+1) = sysd.a(1,1)*y1c(n) + sysd.a(1,2)*y2c(n) + sysd.b(1,1)*U;
    y2c(n+1) = sysd.a(2,1)*y1c(n) + sysd.a(2,2)*y2c(n) + sysd.b(2,1)*U;
end;
t = 0 : ta : (AZ-1)*ta;      % Zeitbereich 1 ms - ta als Zeilenvektor t
%                               % Bild 11-2 mit Gleitkommakoeffizienten
subplot(121);                % Zwei Zeitverlaufsdigramme nebeneinander
stairs(t,y1); hold on;       % Zwei Zeitverläufe in einem Diagramm
stairs(t,y1c,'b. '); hold off; % Werte als Punkte
grid;
title('Zustandssignal y1'); % Ausgangsgröße y, äußerer Integrator
xlabel('t/s');
ylabel('y1[n+1]');
%
subplot(122);                % Innerer Integrator
stairs(t,y2); hold on;
stairs(t,y2c,'b. '); hold off;
grid;
title('Zustandssignal y2 = dy1/dt');
xlabel('t/s');
ylabel('y2[n+1]');

```

*Code 15-1: MATLAB-Code dgl\_lin.m; Auswertung der Gl. 11-22 mit den Systemparametern aus Tabelle 11-1 (vgl. Bild 11-2)*

Mit der Funktion `bin2num(q, Q_Format_Wert)` lassen sich die binären Werte wieder in Gleitkommawerte zurückwandeln und die Differenzengleichungen Gl. 11-22 können so die Ergebnisse für eine Festkommadarstellung abschätzen.

## 15.2 Rechteck- und Trapezintegration

Als Referenz für die Rechteck- und Trapezintegration mit konstanter Abtastperiode  $T$  wird hier ein Runge-Kutta-Verfahren höherer Ordnung mit der MATLAB-Funktion ODE45 genutzt [97]. Die Aufrufe der Funktion ODE45 (vgl. Code 15-2, Code 15-3) erfolgen mit unterschiedlichen Rückgabevektoren der Zeitvariablen und der Ergebnismatrizen für die Lösungen  $y_1$  und  $y_2$  der Gl. 11-18:

```

[t_lin,yvec_1] = ode45(@sos_10_18,[0:dt:N*dt], yinit, [],w0,w_2,d,U);
[t_v,yvec_2] = ode45(@sos_10_18,[0 N*dt], yinit, [],w0,w_2,d,U);

```

Im Integrationsintervall  $[0 \ N*dt]$  wird die Schrittweite von ODE45 automatisch so eingestellt, dass Default-Fehlertoleranzen nicht überschritten werden. In Bild 15-4 ist zum Berechnungsstart bei  $t_y < 0.01$  ms eine dichtere Folge der Punkte für  $y_1$  und Pluszeichen für  $y_2$  dargestellt, die Schrittweiten im Intervall  $0.0055 \mu s < dt < 0.109 \mu s$  aufweist. Im weiteren Verlauf steigt die Schrittweite auf ca.  $6 \mu s > T$  an.

Wird ein Integrationsintervall  $[0:dt:N*dt]$  mit Schrittweite  $dt$  vorgegeben, so enthalten die Rückgabegrößen `[t_lin,yvec_1]` interpolierte Werte für die Zeitvariable `t_lin` und die Lösungsmatrix `yvec_1`. Dem Workspace ist zu entnehmen, dass die  $N=450$  Wertepaare aus 185 nicht äquidistanten Stützstellen berechnet werden.

Nach dem Herleitungsmuster der Rechteck- (RI) und Trapezintegration (TPI) im Kapitel 11.2.1 (vgl. Gl. 11-23 bis 11-28) sind im Folgenden jeweils Kombinationen aus links- und rechtsseitiger Rechteckintegration sowie der Trapezintegration des Systems nach Gl. 11-18 angegeben:

|                 |                                                                                                                                                   |                                                       |
|-----------------|---------------------------------------------------------------------------------------------------------------------------------------------------|-------------------------------------------------------|
| <i>Gl. 15-2</i> | $y_{1l}[n] = y_{1l}[n-1] + Ty_{2l}[n-1]$ $y_{2l}[n] = p_4 y_{2l}[n-1] + T\omega_0^2(u[n-1] - y_{1l}[n-1])$ $p_4 = (1 - 2dT\omega_0)$              | <i>RI linksseitig</i>                                 |
| <i>Gl. 15-3</i> | $y_{1l}[n] = y_{1l}[n-1] + Ty_{2r}[n-1]$ $y_{2r}[n] = p_3 \left( y_{2r}[n-1] + T\omega_0^2(u[n] - y_{1l}[n]) \right)$ $p_3 = 1/(1 + 2Td\omega_0)$ | <i>RI linksseitig</i><br><br><i>RI rechtsseitig</i>   |
| <i>Gl. 15-4</i> | $y_{1r}[n] = y_{1r}[n-1] + Ty_{2l}[n]$ $y_{2l}[n] = p_4 y_{2l}[n-1] + T\omega_0^2(u[n-1] - y_{1r}[n-1])$                                          | <i>RI rechtsseitig</i><br><br><i>RI linksseitig</i>   |
| <i>Gl. 15-5</i> | $y_{1t}[n] = y_{1t}[n-1] + \frac{T}{2} (y_{2l}[n] + y_{2l}[n-1])$ $y_{2l}[n] = p_4 y_{2l}[n-1] + T\omega_0^2(u[n-1] - y_{1t}[n-1])$               | <i>Trapezintegration</i><br><br><i>RI linksseitig</i> |

Bei der rechtsseitigen Integration in Gl. 15-3 und der Trapezintegration in Gl. 11-30 wurde jeweils die Unbekannte  $y_2[n]$  aus dem Integranden für das auszuwertende Intervall  $T(n-1)$  nach  $Tn$  auf der linken Seite der Rekursionsgleichung für  $y_2[n]$  isoliert.

Mit diesen Gleichungen Gl. 15-2 bis Gl. 15-5 und den Gleichungen Gl. 11-29 u. Gl. 11-30 liegen alle Varianten der numerischen Integration des Systems 2. Ordnung nach Gl. 11-18 vor. Der MATLAB-Code `sos_ri_tpi.m` (vgl. Code 15-2, Code 15-3) wertet diese quantitativ aus und stellt die Ergebnisse in den folgenden Diagrammen Bild 15-1 bis Bild 15-7 jeweils der Runge-Kutta-Variante ODE45 gegenüber.

```
% VHDL-Synthese 8. A. Kapitel 11.2
% Numerische Integration des linearen Systems nach Gl. 11-18 (Gl. 9-17)
% 1. Dgl.-System-Lösung mit Runge-Kutta Variante ODE45
% 2. Rechteck- u. Trapezintegration nach Muster in Gl. 11-26 bis Gl. 11-30
% [] no options für ODE45 (Ordinary Differential Equations)
d = 0.2;      % Dämpfung, vgl. Tabelle 9-6
```

```

f0=4774.65; % Frequenz, bei der am Ausgang y 90° Phasendrehung vorliegt
w0=2*pi*f0; % Kreisfrequenz
w_2=w0*w0;
N = 45*10;      % Anzahl Abtastzeitpunkte u. Ergebniswerte
dt = 1/480000;  % Abtatsperiode T=1/fa=2.083 µs; Schrittweite
% Analysierter Zeitbereich N*dt=450/480 kHz=0.9375 ms
yinit = [0; 0]; % Initialisierung des Spaltenvektors [y1; y2]
U = 1;          % Sprungantwort
% 1. Integration mit variabler Schrittweite nach Runge-Kutta
% Aufruf der Funktion sos_11_18.m, die Gl. 10-18 enthält
% Zeit-Werte-Paare durch Interpolation mit konstanter Schrittweite dt
[t_lin,yvec_1] = ode45(@sos_11_18,[0:dt:N*dt], yinit, [],w0,w_2,d,U);
% Rückgabvektor t (N+1)x1; Rückgabematrix yvec (N+1)x2: [y1(t), y2(t)]
% Zeit-Werte-Paare mit variabler Schrittweite im Intervall [0 N*dt]
[t_v,yvec_2] = ode45(@sos_11_18,[0 N*dt], yinit, [],w0,w_2,d,U);
%
% Koeffizienten der Rechteck- (RI) u. Trapezintegration (TPI)
% Gl. 11-31 fb=p1*p2, Gl. 11-32 f=dt*w_2*p2/2
p1 = 1 - dt*d*w0;      % Zählerfaktor TPI y2      p1=0.9875
p2 = 1/(1 + dt*d*w0);  % Nennerfaktor TPI y2:      p2=0.9877
p3 = 1/(1 + 2*dt*d*w0); % Nennerfaktor RI y2r      p3=0.9756
p4 = 1-2*dt*d*w0;      % Zählerfaktor RI y2l       p4=0.75
% Initialisierungen der Zustandsgrößen y1 u. y2 für RI und TPI
y1l = zeros([1 N+1]);  y1ll = zeros(1, N+1); % RI linksseitig
y2l = zeros([1 N+1]);  y2ll = zeros(1, N+1); y2lr = zeros(1, N+1);
y1r = zeros([1 N+1]);  % RI rechtsseitig
y2r = zeros([1 N+1]);  % RI rechtsseitig
y1t = zeros([1 N+1]);  % TPI
y2t = zeros([1 N+1]);  % TPI
u = ones([1 N+1]);     % Sprungantwort
ty = 0 : dt : N*dt;    % N+1 Werte für Zeitachse
% Gl. 15-2 linksseitige RI für beide Zustandsgrößen y1ll, y2ll
for n = 1:1:N+1
    if n == 1          % ty=0
        y2ll(n) = 0;
        y1ll(n) = 0;
    else
        y2ll(n) = p4*y2ll(n-1) + dt*w_2*(u(n-1)- y1ll(n-1));
        y1ll(n) = y1ll(n-1) + dt*y2ll(n-1);
    end;
end;
% Gl. 15-3 linksseitige RI für y1l u. rechtsseitige RI für y2r
for n = 1:1:N+1
    if n == 1          % ty =0
        y1l(n) = 0;
        y2r(n) = p3*(0 + dt*w_2*(u(n)));
    else
        y1l(n) = y1l(n-1) + dt*y2r(n-1); %
        y2r(n) = p3*(y2r(n-1) + dt*w_2*(u(n)- y1l(n)));
    end;
end;
% Gl. 15-4 rechtsseitige RI für y1r u. linksseitige RI für y2l
for n = 1:1:N+1
    if n == 1          % ty=0
        y2l(n) = 0;
        y1r(n) = 0;
    else
        y2l(n) = p4*y2l(n-1) + dt*w_2*(u(n-1)- y1r(n-1));
        y1r(n) = y1r(n-1) + dt*y2l(n); %
    end;
end;

```

```

end;
end;

figure(1); % Linksseitige Integration
subplot(121); % Zwei Zeitverlaufsdigramme nebeneinander
plot(ty,y1l1,'b.',t_lin,yvec_1(:,1),'k+', 'MarkerSize',12); % Gl. 15-2
grid;
axis([0,N*dt,0.0, 1.6]);
title('Rechteckintegration Gl. 15-2 y1l, ODE45 y1');
xlabel('t/s'); ylabel('y1=y');
subplot(122);
plot(ty,y2l1/10000,'b.',t_lin,yvec_1(:,2)/10000,'k+', 'MarkerSize',12); grid;
% Gl. 15-2
axis([0,N*dt,-1.5, 2.5]);
title('Rechteckintegration Gl. 15-2 y2l/10000, ODE45 y2/10000');
xlabel('t/s'); ylabel('y2=dy1/dt)/10000');
%
figure(2);
subplot(121); % Gl. 15-3
plot(ty,y1l,'b.',t_lin,yvec_1(:,1),'k+', 'MarkerSize',12); grid;
axis([0,N*dt,0.0, 1.6]);
title('Rechteckintegration Gl. 15-3 y1l, ODE45 y1');
xlabel('t/s'); ylabel('y1=y');
subplot(122) % ODE45
plot(ty,y2r/10000,'b.',t_lin,yvec_1(:,2)/10000,'k+', 'MarkerSize',12); grid;
axis([0,N*dt,-1.5, 2.5]);
title('Rechteckintegration Gl. 15.3 y2r/10000 ODE45 y2/10000');
xlabel('t/s'); ylabel('y2=dy1/dt)/10000');
%
figure(3);
subplot(121); % Gl. 15-4
plot(ty,y1r,'b.',t_lin,yvec_1(:,1),'k+', 'MarkerSize',12); grid; %
axis([0,N*dt,0.0, 1.6]);
title('Rechteckintegration Gl. 15-4 y1r, ODE45 y1');
xlabel('t/s'); ylabel('y1=y');
subplot(122) % ODE45
plot(t_lin,y2l/10000,'b.',t_lin,yvec_1(:,2)/10000,'k+', 'MarkerSize',12);
grid;
axis([0,N*dt,-1.5, 2.5]);
title('Rechteckintegration Gl. 15.4 y2l/10000 ODE45 y2/10000');
xlabel('t/s'); ylabel('y2=dy1/dt)/10000');
% Abweichungen RI zu ODE45
figure(4);
subplot(121); % Gl. 15-4
plot(ty,(y1r-yvec_1(:,1)),'b.',ty,(y2l-
yvec_1(:,2))/10000,'k+', 'MarkerSize',12); grid;
axis([0,N*dt,-0.05,0.05]);
title('Differenz y1r, y2l/10000 in Gl. 15-4 zu ODE45');
xlabel('t/s'); ylabel('y1=y , (y2=dy1/dt)/10000');
subplot(122); % Gl. 15-3
plot(ty,(y1l-yvec_1(:,1)),'b.',ty,(y2r-
yvec_1(:,2))/10000,'k+', 'MarkerSize',12); grid;
axis([0,N*dt,-0.1,0.2]);
title('Differenz y1l, y2r/10000 in Gl. 15-3 zu ODE45');
xlabel('t/s'); ylabel('y1=y , (y2=dy1/dt)/10000');
% Gl. 15-5
% RI y2l TPI y1t
for n = 1:1:N+1
    if n == 1

```

```

y2l(n) = 0;
y1t(n) = 0;% + dt*(y2l(n))/2 ;
else
y2l(n) = p4*y2l(n-1) + dt*w_2*(u(n-1)- y1t(n-1));%
y1t(n) = y1t(n-1) + dt*(y2l(n) + y2l(n-1))/2;
end;
end;
% RI y1l TPI y2t          Gl. 11-29 - Gl. 11-32
for n = 1:1:N+1
    if n == 1
        y1l(n) = 0;
        y2t(n) = p2*dt*w_2*u(n)/2; % y1l(n) = 0
    else
        y1l(n) = y1l(n-1) + dt*y2t(n-1); %
        y2t(n) = p1*p2*y2t(n-1) + p2*dt*w_2*(u(n) + u(n-1)- y1l(n)-y1l(n-1))/2;
    end;
end;
figure(5); %Linksseitige RI y2l u. TPI y1t mit ODE45-Referenz
subplot(121); % Gl. 15-5
plot(ty,y1t,'b.',t_lin,yvec_1(:,1),'k+', 'MarkerSize',12); grid;
axis([0,N*dt,0.0, 1.6]);
title('Trapezintegration Gl. 15-5 y1t, ODE45 y1');
xlabel('t/s'); ylabel('y1=y');
subplot(122);
plot(ty,y2l/10000,'b.',t_lin,yvec_1(:,2)/10000,'k+', 'MarkerSize',12); grid;
axis([0,N*dt,-1.5, 2.5]);
title('Rechteckintegration Gl. 15-5 y2l, ODE45 y2/10000');
xlabel('t/s'); ylabel('y2=dy1/dt)/10000');
%
figure(6);
subplot(121); % Gl. 11-29 Gl. 11-30
plot(ty,y1l,'b.',t_lin,yvec_1(:,1),'k+', 'MarkerSize',12); grid;
axis([0,N*dt,0.0, 1.6]);
title('Rechteckintegration Gl. 11-29 y1l, ODE45 y1');
xlabel('t/s'); ylabel('y1=y');
subplot(122);
plot(ty,y2t/10000,'b.',ty,yvec_1(:,2)/10000,'k+', 'MarkerSize',12); grid;
axis([0,N*dt,-1.5, 2.5]);
title('Trapezintegration Gl. 11-30 y2t/10000, ODE45 y2/10000');
xlabel('t/s'); ylabel('y2=dy1/dt)/10000');
%
%% Reduzierte Abtastfrequenz in Gl. 15.4
N=44;
dt = 1/48000; % Abtatsperiode erhöht T=1/fa=20.83 µs
p4 = 1-2*d*dt*w0; % Zählerfaktor RI y2l p4=0.975
% RI für beide Zustandsgrößen y1r / y2l Gl. 15-4
for n = 1:1:N+1
    if n == 1 % ty=0
        y2l_c(n) = 0;
        y1r_c(n) = 0;
    else
        y2l_c(n) = p4*y2l_c(n-1) + dt*w_2*(u(n-1)- y1r_c(n-1));
        y1r_c(n) = y1r_c(n-1) + dt*y2l_c(n); %
    end;
end;
end;
tya = 0 : dt : N*dt; % N+1 Werte für Zeitachse
% Zeit-Werte-Paare durch Interpolation mit konstanter Schrittweite dt
[t_lina,yvec_1a] = ode45(@sos_11_18,[0:dt:N*dt], yinit, [],w0,w_2,d,U);
figure(7);

```



```

subplot(121);
plot(tya,y1r_c,'b.',t_lina,yvec_1a(:,1),'k+', 'MarkerSize',10); grid;
axis([0,N*dt,0.0, 1.6]);
title('Rechteckintegration Gl. 15.4 y1r, ODE45 y1');
xlabel('t/s'); ylabel('y1=y');
subplot(122)
plot(tya,y2l_c/10000,'b.',t_lina,yvec_1a(:,2)/10000,'k+', 'MarkerSize',10);
grid;
axis([0,N*dt,-1.5, 2.5]);
title('Rechteckintegration Gl. 15-4 y2l, ODE45 y2/10000');
xlabel('t/s'); ylabel('(y2=dy1/dt)/10000');

```

**Code 15-2:** MATLAB-Code *sos\_ri\_tpi.m*. Auswertung der Differenzengleichungen zur kombinierten Rechteck- u. Trapezintegration. Referenz mit ODE45

```

function [ydot]= sos_11_18(t,yinit,w0, w_2,d,u)
%
% Differentialgleichungssystem 2. Ordnung Gl. 11-18 (Gl. 10-17)
% Linke Seite ydot
ydot=[0 ;0]; % Initialisierung des Spaltenvektors [yldot; y2dot]
% 1. Gleichung 1.Ordnung
ydot(1)=yinit(2); % Ableitung der Ausgangsgröße y
% 2. Gleichung 1. Ordnung
ydot(2)=w_2*u - 2*d*w0*yinit(2)- w_2*yinit(1);

```

**Code 15-3:** MATLAB-Code *sos\_11\_18.m* zum Differentialgleichungssystem nach G. 11-18

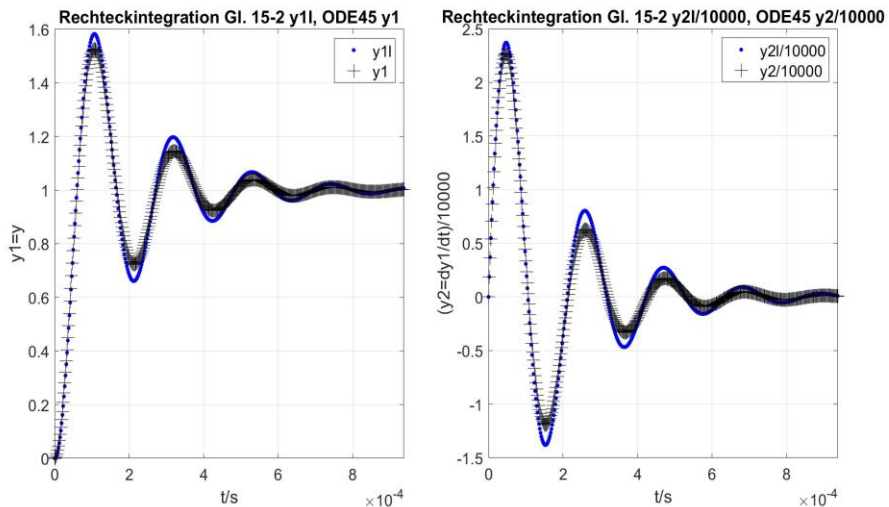

**Bild 15-1:** Linksseitige Rechteckintegration  $y1l$  u.  $y2l$  (Gl. 15-2) im Vergleich zur Referenz  $[t\_lin, yvec\_1]$  mit ODE45 für  $T=1/480$  kHz; Figure(1)

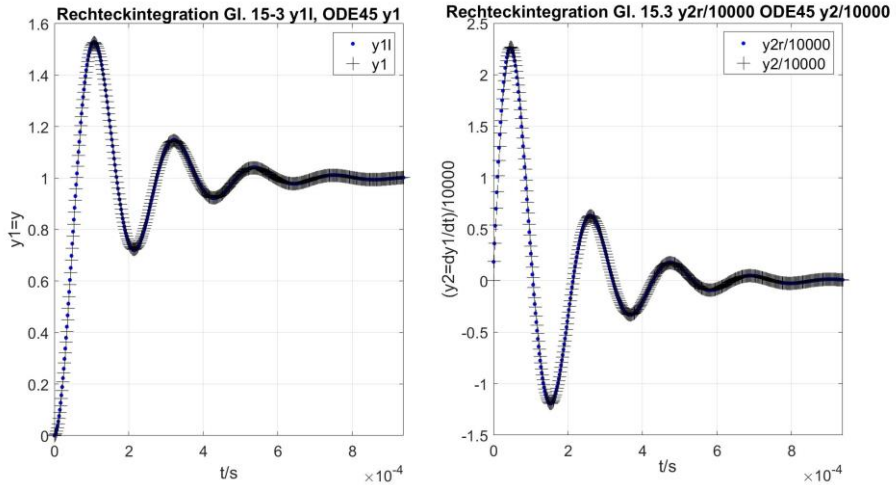

Bild 15-2: Kombinierte linksseitige  $y1l$  u. rechtsseitige  $y2r$  Rechteckintegration (Gl. 15-3) im Vergleich zur Referenz  $[t\_lin, yvec\_1]$  mit ODE45 für  $T=1/480$  kHz; Figure(2)

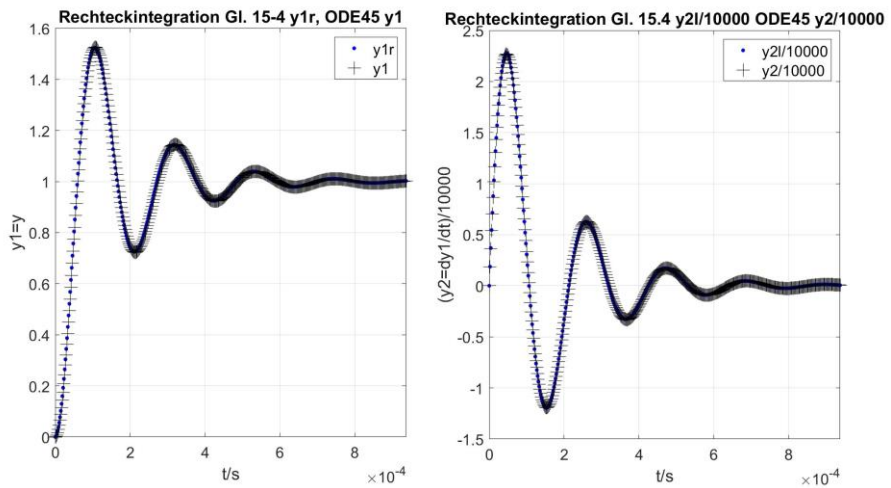

Bild 15-3: Kombinierte rechtsseitige  $y1r$  u. linksseitige  $y2l$  Rechteckintegration (Gl. 15-4) im Vergleich zur Referenz  $[t\_lin, yvec\_1]$  mit ODE45 für  $T=1/480$  kHz; Figure(3)

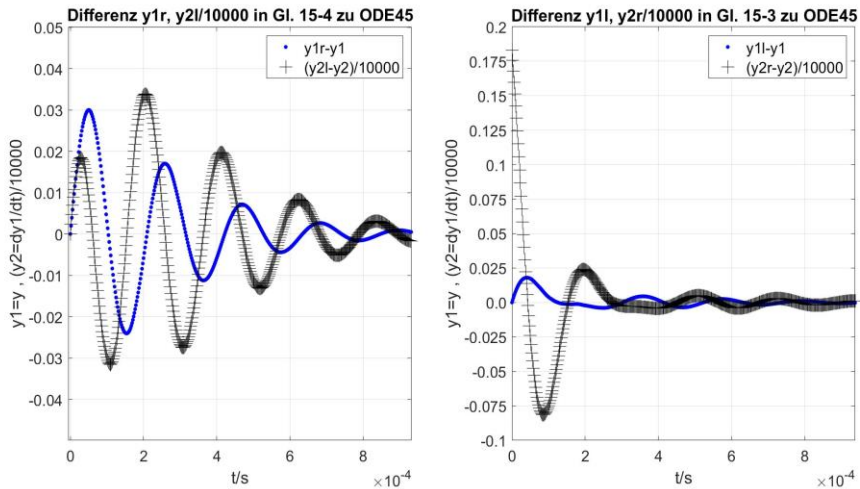

Bild 15-4: Differenzen der kombinierten Rechteckintegrationen zur Referenz  $[t\_lin, yvec\_1]$  mit ODE45 für  $T=1/480$  kHz; Gl. 15-4 links und Gl. 15-3 rechts; Figure(4)

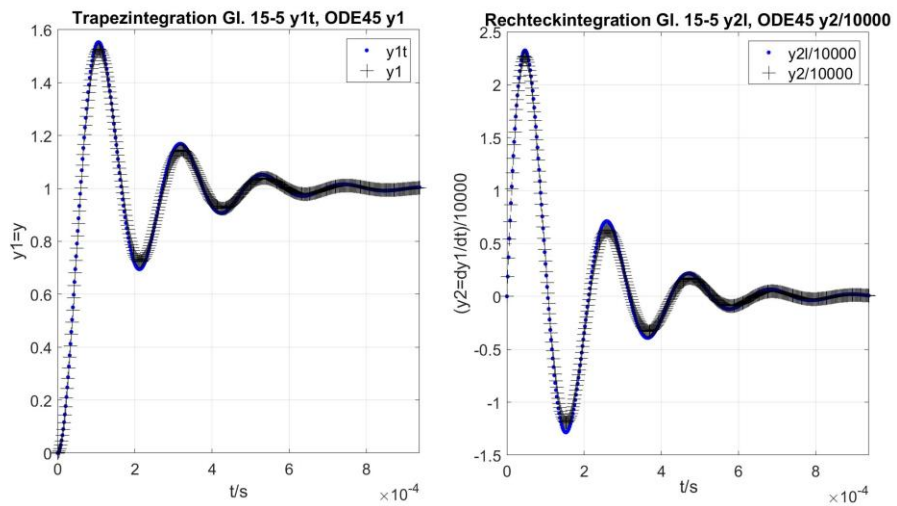

Bild 15-5: Kombinierten Trapez-  $y1t$  u. Rechteckintegration  $y2l$  (Gl. 15-5) im Vergleich zur Referenz  $[t\_lin, yvec\_1]$  mit ODE45 für  $T=1/480$  kHz; Figure(5)

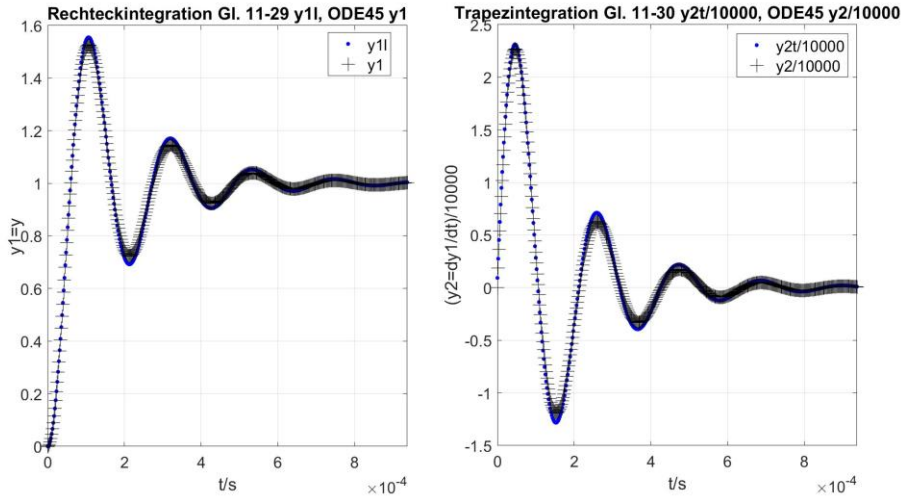

Bild 15-6: Kombinierten Rechteck-  $y1l$  (Gl. 11-29) u. Trapezintegration  $y2t$  (Gl. 11-30) im Vergleich zur Referenz  $[t\_lin, yvec\_1]$  mit ODE45 für  $T=1/480$  kHz; Figure(6)

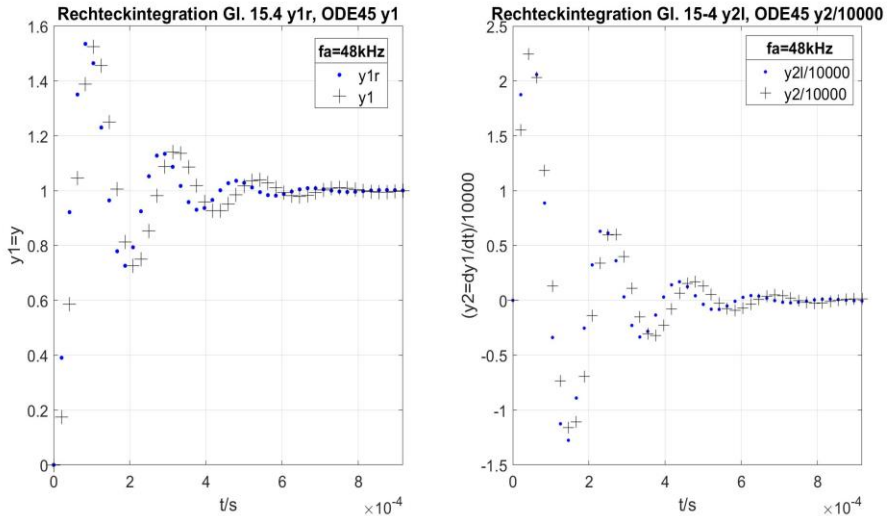

Bild 15-7: Kombinierte rechtsseitige  $y1r$  u. linksseitige  $y2l$  Rechteckintegration (Gl. 15-4) im Vergleich zur Referenz  $[t\_lina, yvec\_1a]$  mit ODE45 für die 10-fache Abtastperiode  $T=1/48$  kHz; Figure(7)

Die Charakteristika der numerischen Integrationsergebnisse in den obigen Diagrammen für das System nach Gl. 11-18 sind in Tabelle 15-1 zusammengefasst:

- Im Vergleich liefert die Kombination aus der rechtsseitigen Integration für  $y_{1r}$  und der linksseitigen Integration für  $y_{2l}$  nach Gl. 15-4 die besten Approximationsergebnisse (vgl. Bild 15-2 u. Bild 15-4). Die Flächenfehler der rechtsseitigen und linksseitigen Rechteckintegration kompensieren sich scheinbar. Bild 15-7 macht im Weiteren deutlich, dass auch im Fall der erhöhten Abtastperiode  $T=1/48$  kHz im Vergleich zu Bild 11-7 geringere Abweichungen auftreten.
- Die Approximationsergebnisse der in Kapitel 11.2 dargestellten RTL-Implementierungen nach den Gleichungen Gl. 11-29 u. Gl. 11-30 sind weniger präzise als Lösungen mit Gl. 15-4 (vgl. Bild 15-6). Die VHDL-Modellierung liefert jedoch mit dem größeren Arithmetikaufwand durch die zusätzlichen Summationsstellen mehr Einblick und Übung bei der Handhabung von Einprozesslösungen und Mehrzyklusdatenpfaden.

Mit den vorgestellten Integrationsansätzen für eine konstante Schrittweite  $T$  (Abtastperiode) und den RTL-Modellen in Kap. 11-2 liegt ein Werkzeugfundus vor, mit dem eine geeignete Lösung auch von nichtlinearen Differentialgleichungssystemen untersucht werden kann.

| Bild | Gleichung    | T in $\mu\text{s}$ | Integration              | Bemerkungen                                                                                                                          |
|------|--------------|--------------------|--------------------------|--------------------------------------------------------------------------------------------------------------------------------------|
| 15-1 | 15-2         | 2.083              | RI: $y_{1l}, y_{2l}$     | Amplituden $y_1$ u. $y_2$ weichen deutlich von der ODE45-Referenz ab. Dämpfung ungenau.                                              |
| 15-2 | 15-3         | 2.083              | RI: $y_{1l}, y_{2r}$     | Kaum Amplitudenabweichungen. Sprungförmiger Start $y_{2r}(0)=1829$ .                                                                 |
| 15-3 | 15-4         | 2.083              | RI: $y_{1r}, y_{2l}$     | Kaum Amplitudenabweichungen.                                                                                                         |
| 15-4 | 15-4, 15-3   | 2.083              | s.o.                     | Differenzen mit Gl. 15-4 unter 2%. Rechtsseitige RI für $y_{2r}$ erzeugt in den ersten $100\mu\text{s}$ größere Anfangsabweichungen. |
| 15-5 | 15-5         | 2.083              | TPI/RI: $y_{1t}, y_{2l}$ | Geringe Amplitudenabweichungen.                                                                                                      |
| 15-6 | 11-29, 11-30 | 2.083              | RI/TPI: $y_{1l}, y_{2t}$ | Amplituden mit Abweichung zur Referenz, wie Gl. 15-5.                                                                                |
| 15-7 | 15-4         | 20.83              | RI: $y_{1r}, y_{2l}$     | Auch mit einer 10-fachen Abtastperiode liegen die $y_{1r}$ - und $y_{2l}$ -Werte noch in der Nähe der ODE45-Referenz.                |

Tabelle 15-1: Gegenüberstellung der Ansätze zur numerischen Integration des linearen Systems nach Gl. 11-18
